# Supplementary material for: On the nature of recurrent Au⋯π motifs in tris(2,2′-bipyridine)M(ii) (M = Fe, Co and Ni) dicyanoaurate(i) salts: X-ray analysis and theoretical rationalization
Source: Royal Society of Chemistry journal article supplement (doi:10.1039/d1dt02632a), 2021-01-01
Supplement: d1dt02632a1.pdf [file d1dt02632a1.pdf]

## Supporting Information

### On the nature of recurrent Au $\cdots\pi$ motifs in tris(2,2'-bipyridine)M(II) (M = Fe, Co and Ni) dicyanoaurate(I) salts: X-ray analysis and theoretical rationalization

Emanuele Priola<sup>a</sup>, Alessia Giordana<sup>a</sup>, Paolo P. Mazzeo<sup>b,c</sup>, Ghodrat Mahmoudi<sup>d,\*</sup>, Rosa M. Gomila<sup>e</sup>, Fedor I. Zubkov<sup>f</sup>, Kuzma M. Pokazeev<sup>f</sup>, Karina S. Valchuk<sup>f</sup>, Alessia Bacchi<sup>b,c</sup>, Ennio Zangrando<sup>g</sup> and Antonio Frontera<sup>e,\*</sup>

---

<sup>a</sup> Department of Chemistry, University of Turin, Via Pietro Giuria 7, 10125 Turin, Italy

<sup>b</sup> Dipartimento di Scienze Chimiche, della Vita e della Sostenibilità Ambientale, Università di Parma, Parco Area delle Scienze 17A, 43124 Parma, Italy

<sup>c</sup> Biopharmanet-TEC, Università degli studi di Parma, via Parco Area delle Scienze 27/A, 43124 Parma, Italy

<sup>d</sup> Department of Chemistry, Faculty of Science, University of Maragheh, P.O. Box 55181-83111, Maragheh, Iran. E-mail: ghodratmahmoudi@gmail.com

<sup>e</sup> Department of Chemistry, Universitat de les Illes Balears, Crta. de Valldemossa km 7.5, 07122 Palma de Mallorca (Balears), Spain. Email: toni.frontera@uib.es

<sup>f</sup> Faculty of Science, Peoples' Friendship University of Russia (RUDN University), 6 Miklukho-Maklaya St., Moscow 117198, Russian Federation

<sup>g</sup> Department of Chemical and Pharmaceutical Sciences, University of Trieste, Via L. Giorgieri 1, 34127 Trieste, Italy

**Figure S1** ORTEP plot of the asymmetric unit for compound **1**.

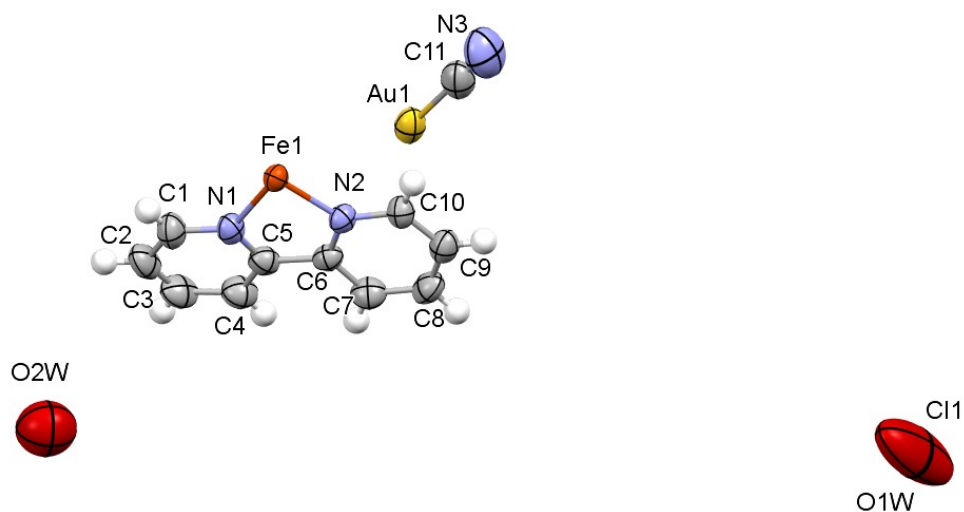

**Table S1** Crystal data and structure refinement for compound **1**.

|                                    |                                                                                                   |
|------------------------------------|---------------------------------------------------------------------------------------------------|
| Identification code                | <b>1</b>                                                                                          |
| Empirical formula                  | C <sub>66</sub> H <sub>48</sub> Au <sub>3</sub> ClFe <sub>2</sub> N <sub>18</sub> O <sub>11</sub> |
| Formula weight                     | 2007.27                                                                                           |
| Temperature/K                      | 293(2)                                                                                            |
| Crystal system                     | trigonal                                                                                          |
| Space group                        | R-3                                                                                               |
| a/Å                                | 16.6981(5)                                                                                        |
| b/Å                                | 16.6981(5)                                                                                        |
| c/Å                                | 22.3503(8)                                                                                        |
| α/°                                | 90                                                                                                |
| β/°                                | 90                                                                                                |
| γ/°                                | 120                                                                                               |
| Volume/Å <sup>3</sup>              | 5396.9(4)                                                                                         |
| Z                                  | 3                                                                                                 |
| ρ <sub>calc</sub> /cm <sup>3</sup> | 1.853                                                                                             |
| μ/mm <sup>-1</sup>                 | 6.596                                                                                             |
| F(000)                             | 2892.0                                                                                            |
| Crystal size/mm <sup>3</sup>       | 0.560 × 0.320 × 0.250                                                                             |
| Radiation                          | MoKα (λ = 0.71073)                                                                                |
| 2θ range for data collection/°     | 6.712 to 64.36                                                                                    |
| Index ranges                       | -16 ≤ h ≤ 23, -24 ≤ k ≤ 18, -31 ≤ l ≤ 26                                                          |
| Reflections collected              | 8448                                                                                              |
| Independent reflections            | 3801 [R <sub>int</sub> = 0.0495, R <sub>sigma</sub> = 0.0677]                                     |

|                                             |                                                   |
|---------------------------------------------|---------------------------------------------------|
| Data/restraints/parameters                  | 3801/0/163                                        |
| Goodness-of-fit on F <sup>2</sup>           | 1.013                                             |
| Final R indexes [I>2σ(I)]                   | R <sub>1</sub> = 0.0586, wR <sub>2</sub> = 0.1133 |
| Final R indexes [all data]                  | R <sub>1</sub> = 0.1089, wR <sub>2</sub> = 0.1340 |
| Largest diff. peak/hole / e Å <sup>-3</sup> | 2.14/-1.45                                        |

**Table S2** Anisotropic Displacement Parameters (Å<sup>2</sup>×10<sup>3</sup>) for **1**. The Anisotropic displacement factor exponent takes the form:  $-2\pi^2[h^2a^2U_{11}+2hka*b*U_{12}+\dots]$ .

| Atom | U <sub>11</sub> | U <sub>22</sub> | U <sub>33</sub> | U <sub>23</sub> | U <sub>13</sub> | U <sub>12</sub> |
|------|-----------------|-----------------|-----------------|-----------------|-----------------|-----------------|
| Au1  | 83.5 (3)        | 50.8 (2)        | 47.8 (2)        | 2.06 (13)       | -5.56 (15)      | 31.60 (19)      |
| C11  | 103 (6)         | 65 (4)          | 61 (4)          | 1 (3)           | -2 (4)          | 47 (4)          |
| N3   | 139 (7)         | 118 (7)         | 77 (4)          | 10 (4)          | 28 (5)          | 66 (6)          |
| Fe1  | 42.5 (4)        | 42.5 (4)        | 30.7 (5)        | 0               | 0               | 21.3 (2)        |
| N1   | 60 (3)          | 51 (3)          | 35 (2)          | 4.2 (18)        | 5.9 (19)        | 30 (2)          |
| N2   | 45 (2)          | 48 (3)          | 34.2 (19)       | 3.2 (17)        | 2.9 (17)        | 22 (2)          |
| C1   | 77 (5)          | 64 (4)          | 47 (3)          | -6 (3)          | 3 (3)           | 37 (4)          |
| C2   | 96 (6)          | 91 (5)          | 49 (3)          | 0 (3)           | 16 (3)          | 66 (5)          |
| C3   | 72 (5)          | 103 (6)         | 57 (4)          | 12 (3)          | 21 (3)          | 58 (5)          |
| C4   | 59 (4)          | 76 (5)          | 64 (4)          | 7 (3)           | 10 (3)          | 38 (4)          |
| C5   | 56 (4)          | 58 (4)          | 47 (3)          | 6 (2)           | 4 (2)           | 34 (3)          |
| C6   | 43 (3)          | 43 (3)          | 47 (3)          | 5 (2)           | -2 (2)          | 21 (2)          |
| C7   | 48 (3)          | 59 (4)          | 66 (4)          | 6 (3)           | 4 (3)           | 23 (3)          |
| C8   | 57 (4)          | 50 (4)          | 64 (3)          | -6 (3)          | -19 (3)         | 19 (3)          |
| C9   | 68 (4)          | 55 (4)          | 45 (3)          | -2 (3)          | -5 (3)          | 29 (3)          |
| C10  | 54 (3)          | 46 (3)          | 43 (3)          | -1 (2)          | 3 (2)           | 23 (3)          |
| C11  | 67 (7)          | 80 (8)          | 98 (10)         | 12 (7)          | 17 (6)          | 32 (7)          |
| O1W  | 580 (40)        | 510 (40)        | 175 (14)        | 97 (18)         | 142 (19)        | 470 (30)        |
| O2W  | 184 (9)         | 186 (9)         | 177 (8)         | 22 (6)          | 7 (7)           | 96 (8)          |

**Table S3** Bond Lengths for **1**.

| Table 4 Bond Lengths for FeAu1. |                  |            |  |      |      |            |
|---------------------------------|------------------|------------|--|------|------|------------|
| Atom                            | Atom             | Length/Å   |  | Atom | Atom | Length/Å   |
| Au1                             | C11 <sup>1</sup> | 1.978 (9)  |  | N2   | C6   | 1.346 (6)  |
| Au1                             | C11              | 1.978 (9)  |  | N2   | C10  | 1.351 (6)  |
| C11                             | N3               | 1.147 (10) |  | C1   | C2   | 1.383 (9)  |
| Fe1                             | N2               | 1.980 (4)  |  | C2   | C3   | 1.366 (10) |
| Fe1                             | N2 <sup>2</sup>  | 1.980 (4)  |  | C3   | C4   | 1.378 (9)  |
| Fe1                             | N2 <sup>3</sup>  | 1.980 (4)  |  | C4   | C5   | 1.395 (8)  |
| Fe1                             | N1 <sup>2</sup>  | 1.986 (4)  |  | C5   | C6   | 1.471 (7)  |
| Fe1                             | N1 <sup>3</sup>  | 1.986 (4)  |  | C6   | C7   | 1.377 (8)  |
| Fe1                             | N1               | 1.986 (4)  |  | C7   | C8   | 1.393 (8)  |
| N1                              | C5               | 1.346 (7)  |  | C8   | C9   | 1.382 (9)  |
| N1                              | C1               | 1.355 (7)  |  | C9   | C10  | 1.381 (8)  |

<sup>1</sup>1-X,2-Y,-Z; <sup>2</sup>1-Y,1+X-Y,+Z; <sup>3</sup>+Y-X,1-X,+Z

**Table S4** Bond Angles for compound **1**.

| Atom             | Atom | Atom            | Angle/°     | Atom | Atom | Atom | Angle/°   |
|------------------|------|-----------------|-------------|------|------|------|-----------|
| C11 <sup>1</sup> | Au1  | C11             | 180.0       | C1   | N1   | Fe1  | 127.0 (4) |
| N3               | C11  | Au1             | 178.5 (8)   | C6   | N2   | C10  | 116.6 (5) |
| N2               | Fe1  | N2 <sup>2</sup> | 94.50 (15)  | C6   | N2   | Fe1  | 115.7 (3) |
| N2               | Fe1  | N2 <sup>3</sup> | 94.50 (15)  | C10  | N2   | Fe1  | 127.6 (4) |
| N2 <sup>2</sup>  | Fe1  | N2 <sup>3</sup> | 94.50 (15)  | N1   | C1   | C2   | 122.5 (6) |
| N2               | Fe1  | N1 <sup>2</sup> | 91.57 (17)  | C3   | C2   | C1   | 119.4 (6) |
| N2 <sup>2</sup>  | Fe1  | N1 <sup>2</sup> | 80.73 (18)  | C2   | C3   | C4   | 119.3 (6) |
| N2 <sup>3</sup>  | Fe1  | N1 <sup>2</sup> | 172.57 (18) | C3   | C4   | C5   | 118.9 (6) |
| N2               | Fe1  | N1 <sup>3</sup> | 172.57 (18) | N1   | C5   | C4   | 122.3 (5) |
| N2 <sup>2</sup>  | Fe1  | N1 <sup>3</sup> | 91.57 (17)  | N1   | C5   | C6   | 114.1 (4) |
| N2 <sup>3</sup>  | Fe1  | N1 <sup>3</sup> | 80.73 (18)  | C4   | C5   | C6   | 123.6 (6) |
| N1 <sup>2</sup>  | Fe1  | N1 <sup>3</sup> | 93.64 (17)  | N2   | C6   | C7   | 122.9 (5) |
| N2               | Fe1  | N1              | 80.73 (18)  | N2   | C6   | C5   | 113.8 (5) |
| N2 <sup>2</sup>  | Fe1  | N1              | 172.57 (18) | C7   | C6   | C5   | 123.2 (5) |
| N2 <sup>3</sup>  | Fe1  | N1              | 91.57 (17)  | C6   | C7   | C8   | 119.8 (6) |
| N1 <sup>2</sup>  | Fe1  | N1              | 93.64 (17)  | C9   | C8   | C7   | 117.8 (6) |
| N1 <sup>3</sup>  | Fe1  | N1              | 93.64 (17)  | C10  | C9   | C8   | 119.1 (5) |
| C5               | N1   | C1              | 117.5 (5)   | N2   | C10  | C9   | 123.6 (5) |
| C5               | N1   | Fe1             | 115.2 (3)   |      |      |      |           |

<sup>1</sup>1-X,2-Y,-Z; <sup>2</sup>1-Y,1+X-Y,+Z; <sup>3</sup>+Y-X,1-X,+Z

**Figure S2** ORTEP plot of the asymmetric unit for compound **2**.

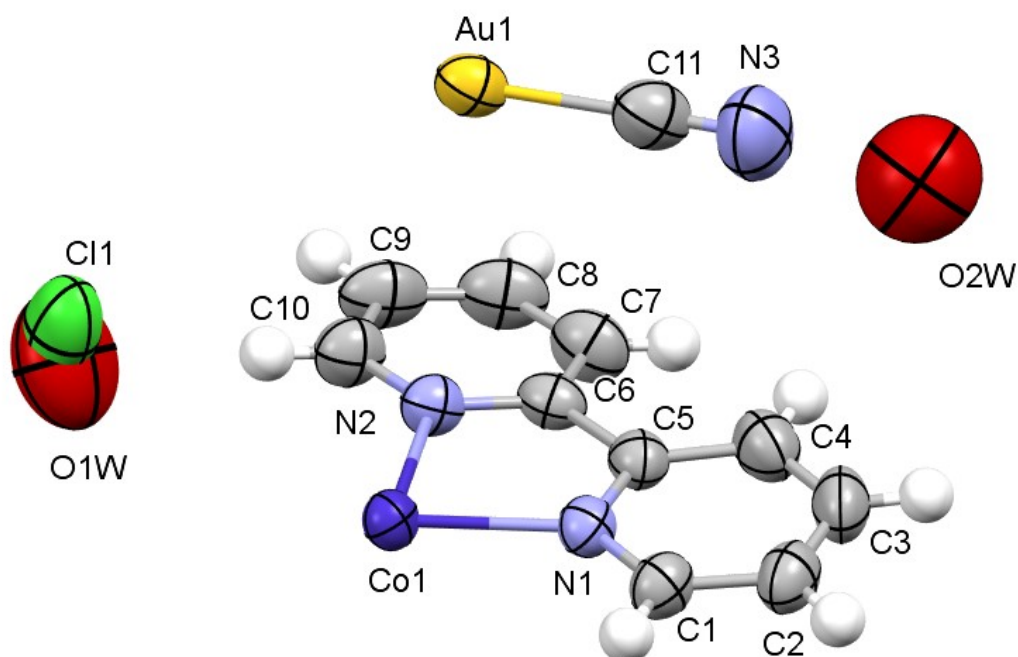

**Table S5** Crystal data and structure refinement for compound **2**.

|                                             |                                                                                                   |
|---------------------------------------------|---------------------------------------------------------------------------------------------------|
| Identification code                         | <b>2</b>                                                                                          |
| Empirical formula                           | C <sub>66</sub> H <sub>48</sub> Au <sub>3</sub> ClCo <sub>2</sub> N <sub>18</sub> O <sub>11</sub> |
| Formula weight                              | 2013.43                                                                                           |
| Temperature/K                               | 293(2)                                                                                            |
| Crystal system                              | trigonal                                                                                          |
| Space group                                 | R-3                                                                                               |
| a/Å                                         | 16.6621(11)                                                                                       |
| b/Å                                         | 16.6621(11)                                                                                       |
| c/Å                                         | 22.4615(10)                                                                                       |
| α/°                                         | 90                                                                                                |
| β/°                                         | 90                                                                                                |
| γ/°                                         | 120                                                                                               |
| Volume/Å <sup>3</sup>                       | 5400.4(8)                                                                                         |
| Z                                           | 3                                                                                                 |
| ρ <sub>calc</sub> /g/cm <sup>3</sup>        | 1.857                                                                                             |
| μ/mm <sup>-1</sup>                          | 6.649                                                                                             |
| F(000)                                      | 2898.0                                                                                            |
| Crystal size/mm <sup>3</sup>                | 0.45 × 0.30 × 0.25                                                                                |
| Radiation                                   | MoKα (λ = 0.71073)                                                                                |
| 2θ range for data collection/°              | 7.318 to 64.672                                                                                   |
| Index ranges                                | -24 ≤ h ≤ 19, -24 ≤ k ≤ 24, -33 ≤ l ≤ 31                                                          |
| Reflections collected                       | 11697                                                                                             |
| Independent reflections                     | 3833 [R <sub>int</sub> = 0.0447, R <sub>sigma</sub> = 0.0415]                                     |
| Data/restraints/parameters                  | 3833/0/163                                                                                        |
| Goodness-of-fit on F <sup>2</sup>           | 1.026                                                                                             |
| Final R indexes [I >= 2σ (I)]               | R <sub>1</sub> = 0.0368, wR <sub>2</sub> = 0.0728                                                 |
| Final R indexes [all data]                  | R <sub>1</sub> = 0.0680, wR <sub>2</sub> = 0.0846                                                 |
| Largest diff. peak/hole / e Å <sup>-3</sup> | 1.80/-0.81                                                                                        |

**Table S6** Anisotropic Displacement Parameters (Å<sup>2</sup>×10<sup>3</sup>) for **2**. The Anisotropic displacement factor exponent takes the form: -2π<sup>2</sup>[h<sup>2</sup>a\*<sup>2</sup>U<sub>11</sub>+2hka\*b\*U<sub>12</sub>+...].

| Atom | U <sub>11</sub> | U <sub>22</sub> | U <sub>33</sub> | U <sub>23</sub> | U <sub>13</sub> | U <sub>12</sub> |
|------|-----------------|-----------------|-----------------|-----------------|-----------------|-----------------|
| Au1  | 48.48 (14)      | 70.18 (17)      | 46.85 (13)      | 1.44 (9)        | -1.87 (8)       | 27.31 (11)      |
| N3   | 109 (4)         | 119 (4)         | 87 (3)          | -32 (3)         | -8 (3)          | 62 (3)          |
| C11  | 60 (3)          | 88 (3)          | 56 (2)          | -3 (2)          | -4.0 (19)       | 33 (2)          |
| Co1  | 45.4 (3)        | 45.4 (3)        | 31.6 (3)        | 0               | 0               | 22.70 (14)      |
| N1   | 48.2 (16)       | 43.9 (15)       | 36.8 (13)       | 0.8 (11)        | 1.5 (12)        | 22.1 (13)       |
| N2   | 47.1 (17)       | 54.1 (18)       | 37.5 (14)       | -0.3 (12)       | -3.2 (12)       | 23.6 (14)       |
| C1   | 58 (2)          | 53 (2)          | 41.2 (18)       | -2.6 (15)       | -3.8 (16)       | 25.4 (19)       |
| C2   | 72 (3)          | 55 (2)          | 49 (2)          | -7.7 (17)       | 3.8 (19)        | 27 (2)          |
| C3   | 77 (3)          | 58 (2)          | 68 (3)          | -9 (2)          | 12 (2)          | 38 (2)          |
| C4   | 64 (3)          | 67 (3)          | 73 (3)          | 2 (2)           | 8 (2)           | 40 (2)          |
| C5   | 46.7 (19)       | 43.9 (19)       | 45.9 (18)       | 2.8 (14)        | 5.0 (14)        | 21.8 (16)       |
| C6   | 41.4 (19)       | 53 (2)          | 48.4 (18)       | 9.5 (15)        | 3.2 (15)        | 22.4 (17)       |
| C7   | 63 (3)          | 79 (3)          | 68 (3)          | 7 (2)           | -7 (2)          | 43 (2)          |
| C8   | 59 (2)          | 89 (3)          | 61 (2)          | 13 (2)          | -13 (2)         | 35 (2)          |

|     |          |          |          |           |            |          |
|-----|----------|----------|----------|-----------|------------|----------|
| C9  | 58 (2)   | 88 (3)   | 47 (2)   | 0 (2)     | -14.7 (18) | 23 (2)   |
| C10 | 61 (2)   | 67 (3)   | 47 (2)   | -5.0 (18) | -8.8 (17)  | 29 (2)   |
| C11 | 119 (9)  | 109 (9)  | 128 (14) | -36 (10)  | -41 (10)   | 79 (8)   |
| O2W | 203 (6)  | 185 (6)  | 168 (6)  | 8 (4)     | -13 (4)    | 100 (5)  |
| O1W | 231 (12) | 218 (14) | 100 (5)  | 14 (7)    | 23 (6)     | 142 (11) |

**Table S7 Bond Lengths for 2.**

| <b>Table 4 Bond Lengths for CoAu1c.</b> |                  |           |      |      |           |
|-----------------------------------------|------------------|-----------|------|------|-----------|
| Atom                                    | Atom             | Length/Å  | Atom | Atom | Length/Å  |
| Au1                                     | C11 <sup>1</sup> | 1.986 (5) | N2   | C6   | 1.347 (5) |
| Au1                                     | C11              | 1.986 (5) | C1   | C2   | 1.382 (6) |
| N3                                      | C11              | 1.139 (6) | C2   | C3   | 1.372 (6) |
| Co1                                     | N2 <sup>2</sup>  | 2.131 (3) | C3   | C4   | 1.373 (6) |
| Co1                                     | N2 <sup>3</sup>  | 2.131 (3) | C4   | C5   | 1.396 (5) |
| Co1                                     | N2               | 2.131 (3) | C5   | C6   | 1.480 (5) |
| Co1                                     | N1               | 2.133 (3) | C6   | C7   | 1.390 (5) |
| Co1                                     | N1 <sup>3</sup>  | 2.133 (3) | C7   | C8   | 1.374 (6) |
| Co1                                     | N1 <sup>2</sup>  | 2.133 (3) | C8   | C9   | 1.355 (6) |
| N1                                      | C1               | 1.334 (4) | C9   | C10  | 1.394 (6) |
| N1                                      | C5               | 1.345 (4) | C11  | O1W  | 0.51 (4)  |
| N2                                      | C10              | 1.334 (4) |      |      |           |

<sup>1</sup>-X,1-Y,-Z; <sup>2</sup>+Y-X,1-X,+Z; <sup>3</sup>1-Y,1+X-Y,+Z

**Table S8 Bond Angles for 2.**

| Atom             | Atom | Atom            | Angle/°     | Atom | Atom | Atom | Angle/°   |
|------------------|------|-----------------|-------------|------|------|------|-----------|
| C11 <sup>1</sup> | Au1  | C11             | 180.0 (3)   | C5   | N1   | Co1  | 115.3 (2) |
| N3               | C11  | Au1             | 178.8 (5)   | C10  | N2   | C6   | 118.7 (3) |
| N2 <sup>2</sup>  | Co1  | N2 <sup>3</sup> | 95.23 (10)  | C10  | N2   | Co1  | 125.6 (3) |
| N2 <sup>2</sup>  | Co1  | N2              | 95.23 (10)  | C6   | N2   | Co1  | 115.1 (2) |
| N2 <sup>3</sup>  | Co1  | N2              | 95.22 (10)  | N1   | C1   | C2   | 123.8 (4) |
| N2 <sup>2</sup>  | Co1  | N1              | 93.02 (11)  | C3   | C2   | C1   | 118.0 (4) |
| N2 <sup>3</sup>  | Co1  | N1              | 169.30 (11) | C2   | C3   | C4   | 119.4 (4) |
| N2               | Co1  | N1              | 77.21 (11)  | C3   | C4   | C5   | 119.5 (4) |
| N2 <sup>2</sup>  | Co1  | N1 <sup>3</sup> | 169.30 (11) | N1   | C5   | C4   | 121.3 (3) |
| N2 <sup>3</sup>  | Co1  | N1 <sup>3</sup> | 77.21 (11)  | N1   | C5   | C6   | 115.9 (3) |
| N2               | Co1  | N1 <sup>3</sup> | 93.01 (11)  | C4   | C5   | C6   | 122.8 (3) |
| N1               | Co1  | N1 <sup>3</sup> | 95.45 (10)  | N2   | C6   | C7   | 121.2 (4) |
| N2 <sup>2</sup>  | Co1  | N1 <sup>2</sup> | 77.21 (11)  | N2   | C6   | C5   | 115.7 (3) |
| N2 <sup>3</sup>  | Co1  | N1 <sup>2</sup> | 93.02 (11)  | C7   | C6   | C5   | 123.0 (4) |
| N2               | Co1  | N1 <sup>2</sup> | 169.30 (11) | C8   | C7   | C6   | 119.3 (4) |
| N1               | Co1  | N1 <sup>2</sup> | 95.45 (10)  | C9   | C8   | C7   | 119.7 (4) |
| N1 <sup>3</sup>  | Co1  | N1 <sup>2</sup> | 95.45 (10)  | C8   | C9   | C10  | 118.8 (4) |
| C1               | N1   | C5              | 117.9 (3)   | N2   | C10  | C9   | 122.3 (4) |
| C1               | N1   | Co1             | 126.8 (2)   |      |      |      |           |

<sup>1</sup>-X,1-Y,-Z; <sup>2</sup>+Y-X,1-X,+Z; <sup>3</sup>1-Y,1+X-Y,+Z

**Figure S3** ORTEP plot of the asymmetric unit for compound **3**.

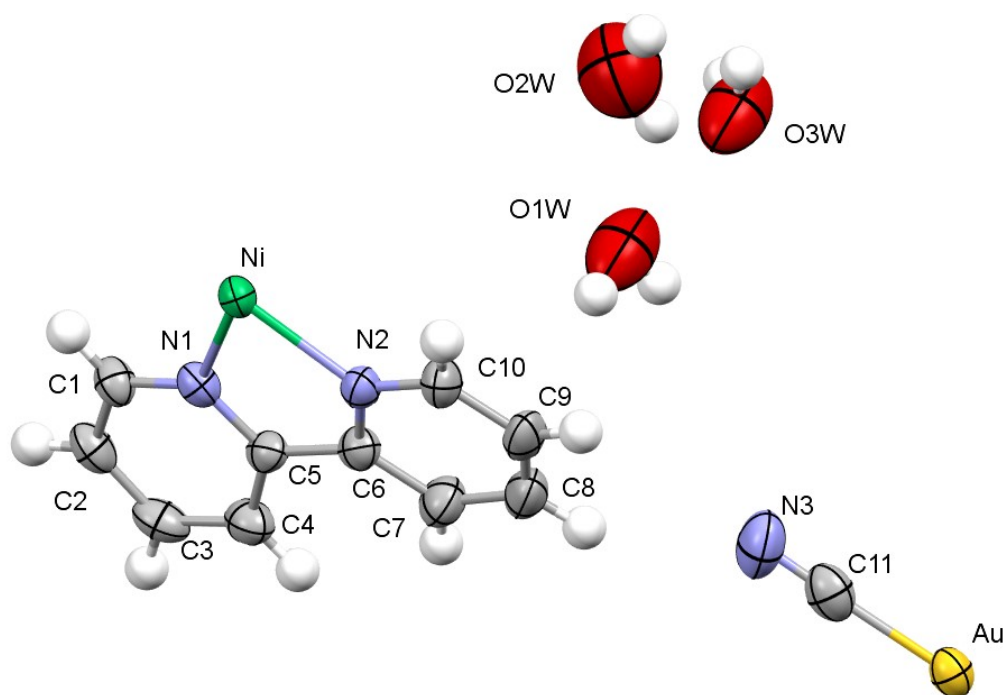

**Table S9** Crystal data and structure refinement for compound **3**.

|                                                |                                                                  |
|------------------------------------------------|------------------------------------------------------------------|
| Identification code                            | <b>3</b>                                                         |
| Empirical formula                              | $C_{66}H_{73}Au_3N_{18}Ni_2O_{13}$                               |
| Formula weight                                 | 2035.75                                                          |
| Temperature/K                                  | 200(2)                                                           |
| Crystal system                                 | trigonal                                                         |
| Space group                                    | R-3                                                              |
| a/Å                                            | 16.4529(6)                                                       |
| b/Å                                            | 16.4529(6)                                                       |
| c/Å                                            | 22.4374(14)                                                      |
| $\alpha/^\circ$                                | 90                                                               |
| $\beta/^\circ$                                 | 90                                                               |
| $\gamma/^\circ$                                | 120                                                              |
| Volume/Å <sup>3</sup>                          | 5260.0(5)                                                        |
| Z                                              | 3                                                                |
| $\rho_{\text{calc}}/\text{cm}^{-3}$            | 1.928                                                            |
| $\mu/\text{mm}^{-1}$                           | 6.857                                                            |
| F(000)                                         | 2979.0                                                           |
| Crystal size/mm <sup>3</sup>                   | 0.35 × 0.25 × 0.25                                               |
| Radiation                                      | MoK $\alpha$ ( $\lambda = 0.71073$ )                             |
| 2 $\theta$ range for data collection/ $^\circ$ | 4.622 to 52.798                                                  |
| Index ranges                                   | -19 ≤ h ≤ 20, -20 ≤ k ≤ 20, -27 ≤ l ≤ 27                         |
| Reflections collected                          | 19600                                                            |
| Independent reflections                        | 2405 [ $R_{\text{int}} = 0.0823$ , $R_{\text{sigma}} = 0.0489$ ] |
| Data/restraints/parameters                     | 2405/0/156                                                       |
| Goodness-of-fit on F <sup>2</sup>              | 1.099                                                            |
| Final R indexes [ $I \geq 2\sigma(I)$ ]        | $R_1 = 0.0410$ , $wR_2 = 0.0942$                                 |

|                                             |                                  |
|---------------------------------------------|----------------------------------|
| Final R indexes [all data]                  | $R_1 = 0.0739$ , $wR_2 = 0.1093$ |
| Largest diff. peak/hole / e Å <sup>-3</sup> | 1.92/-1.81                       |

**Table S10** Anisotropic Displacement Parameters (Å<sup>2</sup>×10<sup>3</sup>) for **3**. The Anisotropic displacement factor exponent takes the form:  $-2\pi^2[h^2a^2U_{11}+2hka*b*U_{12}+...]$ .

| Atom | U <sub>11</sub> | U <sub>22</sub> | U <sub>33</sub> | U <sub>23</sub> | U <sub>13</sub> | U <sub>12</sub> |
|------|-----------------|-----------------|-----------------|-----------------|-----------------|-----------------|
| Au   | 46.8 (3)        | 51.1 (3)        | 36.6 (3)        | 0.86 (18)       | 2.08 (17)       | 30.2 (2)        |
| Ni   | 35.1 (6)        | 35.1 (6)        | 26.3 (7)        | 0               | 0               | 17.6 (3)        |
| N1   | 40 (3)          | 42 (3)          | 32 (3)          | 4 (3)           | 4 (3)           | 25 (3)          |
| N2   | 32 (3)          | 42 (4)          | 33 (3)          | -4 (3)          | -2 (2)          | 17 (3)          |
| C1   | 53 (5)          | 40 (4)          | 32 (4)          | 2 (3)           | 1 (3)           | 28 (4)          |
| C2   | 56 (5)          | 57 (5)          | 33 (4)          | 10 (3)          | 6 (3)           | 36 (4)          |
| C3   | 55 (5)          | 46 (5)          | 52 (5)          | 19 (4)          | 18 (4)          | 28 (4)          |
| C4   | 54 (5)          | 40 (4)          | 46 (5)          | 4 (4)           | 9 (4)           | 19 (4)          |
| C5   | 37 (4)          | 31 (4)          | 38 (4)          | -4 (3)          | 3 (3)           | 15 (3)          |
| C6   | 39 (4)          | 37 (4)          | 38 (4)          | -4 (3)          | 2 (3)           | 19 (3)          |
| C7   | 53 (5)          | 44 (5)          | 51 (5)          | -9 (4)          | -8 (4)          | 19 (4)          |
| C8   | 44 (5)          | 61 (6)          | 48 (5)          | -18 (4)         | -5 (4)          | 18 (4)          |
| C9   | 35 (4)          | 66 (6)          | 43 (5)          | -12 (4)         | -11 (3)         | 21 (4)          |
| C10  | 47 (5)          | 50 (5)          | 37 (4)          | -4 (3)          | -8 (3)          | 22 (4)          |
| N3   | 74 (6)          | 84 (6)          | 63 (5)          | -29 (5)         | -18 (4)         | 42 (5)          |
| C11  | 62 (6)          | 68 (6)          | 46 (5)          | 0 (4)           | 5 (4)           | 43 (5)          |
| O1W  | 148 (8)         | 75 (5)          | 122 (7)         | 6 (5)           | -50 (6)         | 44 (5)          |
| O2W  | 192 (12)        | 164 (11)        | 138 (9)         | 0 (8)           | -1 (8)          | 97 (10)         |
| O3W  | 148 (8)         | 75 (5)          | 122 (7)         | 6 (5)           | -50 (6)         | 44 (5)          |

**Table S11** Bond Lengths for **3**.

| Atom | Atom             | Length/Å   | Atom | Atom | Length/Å   |
|------|------------------|------------|------|------|------------|
| Au   | C11 <sup>1</sup> | 1.984 (10) | N2   | C6   | 1.355 (9)  |
| Au   | C11              | 1.984 (10) | C1   | C2   | 1.378 (10) |
| Ni   | N1 <sup>2</sup>  | 2.091 (6)  | C2   | C3   | 1.385 (11) |
| Ni   | N1               | 2.091 (6)  | C3   | C4   | 1.378 (11) |
| Ni   | N1 <sup>3</sup>  | 2.091 (6)  | C4   | C5   | 1.391 (10) |
| Ni   | N2 <sup>2</sup>  | 2.091 (6)  | C5   | C6   | 1.465 (10) |
| Ni   | N2 <sup>3</sup>  | 2.091 (6)  | C6   | C7   | 1.393 (10) |
| Ni   | N2               | 2.091 (6)  | C7   | C8   | 1.374 (11) |
| N1   | C1               | 1.336 (9)  | C8   | C9   | 1.366 (12) |
| N1   | C5               | 1.351 (9)  | C9   | C10  | 1.376 (11) |
| N2   | C10              | 1.331 (9)  | N3   | C11  | 1.150 (11) |

<sup>1</sup>7/3-X,5/3-Y,5/3-Z; <sup>2</sup>1+Y-X,1-X,+Z; <sup>3</sup>1-Y,+X-Y,+Z



**Table S12 Bond Angles for 3.**

| Atom             | Atom | Atom            | Angle/°   | Atom | Atom | Atom | Angle/°   |
|------------------|------|-----------------|-----------|------|------|------|-----------|
| C11 <sup>1</sup> | Au   | C11             | 180.0     | C10  | N2   | C6   | 118.9 (6) |
| N1 <sup>2</sup>  | Ni   | N1              | 94.5 (2)  | C10  | N2   | Ni   | 126.5 (5) |
| N1 <sup>2</sup>  | Ni   | N1 <sup>3</sup> | 94.5 (2)  | C6   | N2   | Ni   | 114.1 (4) |
| N1               | Ni   | N1 <sup>3</sup> | 94.5 (2)  | N1   | C1   | C2   | 122.3 (7) |
| N1 <sup>2</sup>  | Ni   | N2 <sup>2</sup> | 78.9 (2)  | C1   | C2   | C3   | 119.1 (7) |
| N1               | Ni   | N2 <sup>2</sup> | 170.1 (2) | C4   | C3   | C2   | 119.2 (7) |
| N1 <sup>3</sup>  | Ni   | N2 <sup>2</sup> | 93.4 (2)  | C3   | C4   | C5   | 118.8 (7) |
| N1 <sup>2</sup>  | Ni   | N2 <sup>3</sup> | 170.1 (2) | N1   | C5   | C4   | 121.7 (7) |
| N1               | Ni   | N2 <sup>3</sup> | 93.3 (2)  | N1   | C5   | C6   | 116.1 (6) |
| N1 <sup>3</sup>  | Ni   | N2 <sup>3</sup> | 78.9 (2)  | C4   | C5   | C6   | 122.2 (6) |
| N2 <sup>2</sup>  | Ni   | N2 <sup>3</sup> | 94.0 (2)  | N2   | C6   | C7   | 120.8 (7) |
| N1 <sup>2</sup>  | Ni   | N2              | 93.3 (2)  | N2   | C6   | C5   | 116.0 (6) |
| N1               | Ni   | N2              | 78.9 (2)  | C7   | C6   | C5   | 123.2 (7) |
| N1 <sup>3</sup>  | Ni   | N2              | 170.1 (2) | C8   | C7   | C6   | 119.4 (8) |
| N2 <sup>2</sup>  | Ni   | N2              | 94.0 (2)  | C9   | C8   | C7   | 118.8 (7) |
| N2 <sup>3</sup>  | Ni   | N2              | 94.0 (2)  | C8   | C9   | C10  | 119.8 (8) |
| C1               | N1   | C5              | 118.7 (6) | N2   | C10  | C9   | 122.1 (8) |
| C1               | N1   | Ni              | 126.9 (5) | N3   | C11  | Au   | 178.2 (9) |
| C5               | N1   | Ni              | 114.3 (4) |      |      |      |           |

<sup>1</sup>7/3-X,5/3-Y,5/3-Z; <sup>2</sup>1+Y-X,1-X,+Z; <sup>3</sup>1-Y,+X-Y,+Z
